# Supplementary material for: Shared genetic architecture highlights the bidirectional association between major depressive disorder and fracture risk
Source: PubMed Central journal article supplement — Gen Psychiatr. 2024 May 8;37(3):e101418. doi: 10.1136/gpsych-2023-101418 (PMC11086190; doi:10.1136/gpsych-2023-101418), 2024-05-08

## *Supplementary Information*

**Supplementary Table 1** Detailed information on the field identification and codes for participants included in the United Kingdom Biobank. ICD-10, the International Classification of Diseases, 10th Revisions; ICD-9, the International Classification of Diseases, 9th Revision.

**Supplementary Table 2** The International Classification of Diseases (ICD) codes and self-reported codes for excluded diseases.

**Supplementary Table 3** The prevalence of fracture in male, female and pooled samples with or without major depressive disorder (MDD) and the prevalence of MDD in male, female and pooled samples with or without fracture.

**Supplementary Table 4** The prevalence of fracture in different age groups with or without major depressive disorder (MDD) and the prevalence of MDD in different age groups with or without fracture.

**Supplementary Table 5** The information of 74 lead single nucleotide polymorphisms (SNPs) for major depressive disorder (MDD) with the risk of fracture.

**Supplementary Table 6** Baseline characteristics of participants and comparison between individuals with and without major depressive disorder (MDD) and fracture. BMD, bone mineral density; BMI, body mass index.

**Supplementary Table 7** The results of genetic correlation and cross-trait analysis between major depressive disorder (MDD) and fracture.  $rg$  = genetic correlation,  $se$  = standard error of  $rg$ ,  $P$  value = p-value for  $rg$ ,  $gcov\_int$ ,  $gcov\_int\_se$  = cross-trait LD Score regression intercept and standard error.  $nc1@p9$ ,  $nc2@p9$ , and  $nc12@p9$  = the number of causal variants for trait1, trait2 and both, respectively;  $nc@p9$  = number of trait-influencing variants specific to MDD;  $\rho\_beta$  = the correlation of effect sizes within the shared polygenic component;  $rg$  = genetic correlation;  $concordant\_fraction$  = the proportion of shared variants with concordant direction of effect in both traits on all shared variants;  $\pi1$ ,  $\pi2$ , and  $\pi12$  = polygenicity of trait1, trait2 and both, respectively.

**Supplementary Table 8** Distinct genomic loci shared between major depressive disorder (MDD) and fracture at conjunctive false discovery rate (conjFDR)  $< 0.05$ .

**Supplementary Table 9** The results of Summary-data-based Mendelian Randomization (SMR) analyses for the expression of *SGIP1* (ENSG00000118473)

with major depressive disorder (MDD) and fracture in spinal cord (cervical) and muscle (gastrocnemius).

**Supplementary Table 10** The general biological functions of 53 genes.

**Supplementary Fig.1** The matching information of 39 965 patients with fracture.

**Supplementary Fig.2** The prevalence rate in different age groups. Panel A: the prevalence rate for fracture with or without major depressive disorder (MDD). Panel B: the prevalence rate for MDD with or without fracture.

**Supplementary Fig.3** The association of genetically predicted major depressive disorder (MDD) with fracture and vice versa in male and female.

**Supplementary Fig.4** The annotation of genetic associations with Functional mapping and annotation (FUMA). Panel A: the result of genome-wide association study (GWAS) catalog reported genes. Panel B: Multi-marker Analysis of GenoMic Annotation (MAGMA) tissue expression analysis results. Per-tissue enrichment of expression of genes based on Genotype-Tissue Expression (GTEx) RNA-seq data for left 30 general and right 54 specific tissue types.

**Supplementary Fig.5** A simple illustration of the assumptive mechanism: the potential implication of the *SGIP1* gene in the pathology of major depressive disorder (MDD) and fracture.

**Supplementary Table 1** Detailed information on the field identification and codes for participants included in UK Biobank.

| Description  | Field IDs | Codes                                                                                                                                                                                                                                                                                                                                                                                                                                                                                                                                                                                                                                                                                                                                                                                                                                                                                                                                                                                                                                                                                                                                                                                                                                                                                                                                                                                                                                                                                                                                                                                                                                                                                                                                                                                                                                                                                                                                                                                                                                                                                                                                                                                                                                                                                         |
|--------------|-----------|-----------------------------------------------------------------------------------------------------------------------------------------------------------------------------------------------------------------------------------------------------------------------------------------------------------------------------------------------------------------------------------------------------------------------------------------------------------------------------------------------------------------------------------------------------------------------------------------------------------------------------------------------------------------------------------------------------------------------------------------------------------------------------------------------------------------------------------------------------------------------------------------------------------------------------------------------------------------------------------------------------------------------------------------------------------------------------------------------------------------------------------------------------------------------------------------------------------------------------------------------------------------------------------------------------------------------------------------------------------------------------------------------------------------------------------------------------------------------------------------------------------------------------------------------------------------------------------------------------------------------------------------------------------------------------------------------------------------------------------------------------------------------------------------------------------------------------------------------------------------------------------------------------------------------------------------------------------------------------------------------------------------------------------------------------------------------------------------------------------------------------------------------------------------------------------------------------------------------------------------------------------------------------------------------|
| Depression * | 41270     | F320, F321, F322, F323, F328, F329, F330, F331, F332, F333, F334, F338, F339                                                                                                                                                                                                                                                                                                                                                                                                                                                                                                                                                                                                                                                                                                                                                                                                                                                                                                                                                                                                                                                                                                                                                                                                                                                                                                                                                                                                                                                                                                                                                                                                                                                                                                                                                                                                                                                                                                                                                                                                                                                                                                                                                                                                                  |
| Depression † | 41203     | 296.1, 300.4, 311<br>M484, M4840, M4842, M4844, M4845, M4846, M4847, M4848, M4849; M84, M840, M8400, M8401, M8402, M8403, M8404, M8405, M8406, M8407, M8408, M841, M8410, M8411, M8412, M8413, M8414, M8415, M8416, M8417, M8418, M8419, M842, M8421, M8422, M8423, M8424, M8425, M8426, M8427, M8428, M843, M8430, M8435, M8436, M8437, M8438, M8439, S02, S020, S0200, S0201, S021, S0210, S0211, S022, S0220, S0221, S023, S0230, S0231, S024, S0240, S0241, S025, S0250, S0251, S026, S0260, S0261, S027, S0270, S0271, S028, S0280, S0281, S029, S0290, S0291, S12, S120, S1200, S121, S1210, S122, S1220, S127, S1270, S128, S1280, S1281, S129, S1290, S1291, S22, S220, S2200, S221, S2210, S222, S2220, S223, S2230, S2231, S224, S2241, S225, S2250, S2251, S228, S2280, S229, S2290, S32, S320, S3200, S321, S3210, S3211, S322, S3220, S323, S3230, S3231, S324, S3240, S3241, S325, S3250, S3251, S327, S3270, S3271, S328, S3280, S3281, S42, S420, S4200, S4201, S421, S4210, S422, S4220, S4221, S423, S4230, S4231, S424, S4240, S4241, S427, S4270, S4271, S428, S4280, S429, S4290, S52, S520, S5200, S5201, S521, S5210, S5211, S522, S5220, S5221, S523, S5230, S5231, S524, S5240, S5241, S525, S5250, S5251, S526, S5260, S5261, S527, S5270, S5271, S528, S5280, S5281, S529, S5290, S62, S620, S6200, S621, S6210, S6211, S622, S6220, S6221, S623, S6230, S6231, S624, S6240, S6241, S625, S6250, S6251, S626, S6261, S627, S6270, S6271, S628, S6280, S6281, S72, S720, S7200, S7201, S721, S7210, S7211, S722, S7220, S7221, S723, S72230, S7231, S724, S7240, S7241, S727, S7270, S728, S7280, S729, S7290, S7291, S82, S820, S8200, S8201, S821, S8210, S8211, S822, S8220, S8221, S823, S8231, S824, S8240, S8241, S825, S8250, S8251, S826, S8260, S8261, S827, S8270, S8271, S828, S8280, S8281, S8286, S829, S8290, S8291, S92, S920, S9200, S9201, S921, S9210, S9211, S922, S9220, S9221, S923, S9230, S9231, S924, S9240, S9241, S925, S9250, S9251, S927, S9270, S9271, S929, S9290, S9291; T02, T020, T0200, T021, T0210, T022, T0220, T023, T0230, T0231, T024, T0240, T0241, T025, T0250, T0251, T026, T0260, T027, T0270, T028, T0280, T029, T0290; T08, T08X0, T10, T10X0, T12, T142, T1420; T902, T911, T912, T921, T922, T931, T932, X5909, Z544 |
| Fracture*    | 41270     |                                                                                                                                                                                                                                                                                                                                                                                                                                                                                                                                                                                                                                                                                                                                                                                                                                                                                                                                                                                                                                                                                                                                                                                                                                                                                                                                                                                                                                                                                                                                                                                                                                                                                                                                                                                                                                                                                                                                                                                                                                                                                                                                                                                                                                                                                               |

|                                                    |                    |                                                                                                                                                                                                                                                                                                                                                                                                                                                                                                                                                                                                                                                                                                              |
|----------------------------------------------------|--------------------|--------------------------------------------------------------------------------------------------------------------------------------------------------------------------------------------------------------------------------------------------------------------------------------------------------------------------------------------------------------------------------------------------------------------------------------------------------------------------------------------------------------------------------------------------------------------------------------------------------------------------------------------------------------------------------------------------------------|
|                                                    |                    | 7338, 73381, 73382, 73383, 73384, 73385, 73386, 73387, 73388, 73389; 800, 8000, 8001, 8002, 8003, 801, 8010, 8011, 802, 8020, 8022, 8023, 8024, 8026, 8028, 803, 8030, 8031; 805, 8050, 8052, 8054, 8056, 8058; 806, 8064, 807, 8070, 8072, 8074, 808, 8080, 8082, 8084, 8088, 8089, 809, 8090, 8091; 810, 8100, 811, 8110, 812, 8120, 8121, 8122, 8123, 8124, 8125, 813, 8130, 8131, 8132, 8134, 8135, 814, 8140, 8141, 815, 8150, 8151, 816, 8160, 8161, 817, 8170; 820, 8200, 8202, 8208, 8210, 8211, 8212; 822, 8220, 8221; 823, 8230, 8231, 8232, 8233, 8240, 8241, 8242, 8244, 8245, 8246, 8247, 8248, 8249, 825, 8250, 8252, 8253, 826, 8260, 8261, 828, 8280, 829, 8290; 905, 9050, 9052, 9053, 9054 |
| Fracture†                                          | 41203              |                                                                                                                                                                                                                                                                                                                                                                                                                                                                                                                                                                                                                                                                                                              |
| Age when attended assessment centre                | 21003              | \                                                                                                                                                                                                                                                                                                                                                                                                                                                                                                                                                                                                                                                                                                            |
| Sex                                                | 31                 | \                                                                                                                                                                                                                                                                                                                                                                                                                                                                                                                                                                                                                                                                                                            |
| Body mass index                                    | 21001              | \                                                                                                                                                                                                                                                                                                                                                                                                                                                                                                                                                                                                                                                                                                            |
| Smoking status                                     | 20116              | \                                                                                                                                                                                                                                                                                                                                                                                                                                                                                                                                                                                                                                                                                                            |
| Alcohol consumption frequency                      | 1558               | \                                                                                                                                                                                                                                                                                                                                                                                                                                                                                                                                                                                                                                                                                                            |
| Ethnic background                                  | 21000              | 1001, 1002, 1003, 1                                                                                                                                                                                                                                                                                                                                                                                                                                                                                                                                                                                                                                                                                          |
| Kinship                                            | 22021              | 0                                                                                                                                                                                                                                                                                                                                                                                                                                                                                                                                                                                                                                                                                                            |
| Employment status                                  | 6142               | \                                                                                                                                                                                                                                                                                                                                                                                                                                                                                                                                                                                                                                                                                                            |
| Education                                          | 6138               | \                                                                                                                                                                                                                                                                                                                                                                                                                                                                                                                                                                                                                                                                                                            |
| Heel bone mineral density                          | 4105, 3148, 3084   | \                                                                                                                                                                                                                                                                                                                                                                                                                                                                                                                                                                                                                                                                                                            |
| Falls in the last year                             | 2296               | \                                                                                                                                                                                                                                                                                                                                                                                                                                                                                                                                                                                                                                                                                                            |
| Physical activity                                  | 884, 894, 904, 914 | \                                                                                                                                                                                                                                                                                                                                                                                                                                                                                                                                                                                                                                                                                                            |
| Cannabis                                           | 20453              | \                                                                                                                                                                                                                                                                                                                                                                                                                                                                                                                                                                                                                                                                                                            |
|                                                    |                    | 1140921600, 1141180212, 1140879540, 1140879544, 1140867888, 1140867878, 1141201834, 1140867658, 1140867712, 1140867940, 1140867942, 1140882312, 1140867858, 1140867852, 1140867916                                                                                                                                                                                                                                                                                                                                                                                                                                                                                                                           |
| Medication treatments                              | 20003              |                                                                                                                                                                                                                                                                                                                                                                                                                                                                                                                                                                                                                                                                                                              |
| Date of attending assessment center                | 53                 | \                                                                                                                                                                                                                                                                                                                                                                                                                                                                                                                                                                                                                                                                                                            |
| Date lost to follow-up                             | 191                | \                                                                                                                                                                                                                                                                                                                                                                                                                                                                                                                                                                                                                                                                                                            |
| Date of death                                      | 40000              | \                                                                                                                                                                                                                                                                                                                                                                                                                                                                                                                                                                                                                                                                                                            |
| Year when the non-cancer illness first diagnosed   | 20008              | \                                                                                                                                                                                                                                                                                                                                                                                                                                                                                                                                                                                                                                                                                                            |
| Date of first in-patient diagnosis based on ICD-9  | 41263              | \                                                                                                                                                                                                                                                                                                                                                                                                                                                                                                                                                                                                                                                                                                            |
| Date of first in-patient diagnosis based on ICD-10 | 41280              | \                                                                                                                                                                                                                                                                                                                                                                                                                                                                                                                                                                                                                                                                                                            |

|                                                           |       |                                                                                                                                                                                                                                                                                                                                                                                                                                                                                |
|-----------------------------------------------------------|-------|--------------------------------------------------------------------------------------------------------------------------------------------------------------------------------------------------------------------------------------------------------------------------------------------------------------------------------------------------------------------------------------------------------------------------------------------------------------------------------|
| Mental and behavioural disorders due to substance misuse* | 41270 | F10, F100, F101, F102, F103, F104, F105, F106, F107, F108, F109, F11, F110, F111, F112, F113, F114, F115, F117, F119, F12, F120, F121, F122, F123, F125, F128, F129, F13, F130, F131, F132, F133, F134, F139, F14, F140, F141, F142, F145, F149, F15, F150, F151, F152, F153, F155, F158, F159, F16, F161, F162, F163, F165, F167, F168, F169, F17, F170, F171, F172, F173, F174, F177, F179, F18, F181, F182, F185, F189, F19, F190, F191, F192, F193, F194, F195, F198, F199 |
| Schizophrenia, schizotypal and delusional disorders*      | 41270 | F20, F200, F201, F202, F203, F204, F205, F206, F208, F209, F21, F22, F220, F228, F229, F23, F230, F231, F232, F233, F238, F239, F24, F25, F250, F251, F252, F258, F259, F28, F29                                                                                                                                                                                                                                                                                               |
| Anxiety disorders*                                        | 41270 | F40, F400, F401, F402, F408, F409, F41, F410, F411, F412, F413, F418, F419                                                                                                                                                                                                                                                                                                                                                                                                     |
| Reaction to severe stress, and adjustment disorders*      | 41270 | F43, F430, F431, F432, F438, F439                                                                                                                                                                                                                                                                                                                                                                                                                                              |
| Anxiety states†                                           | 41203 | 3000                                                                                                                                                                                                                                                                                                                                                                                                                                                                           |
| stress-related disorder†                                  | 41203 | 308, 3089                                                                                                                                                                                                                                                                                                                                                                                                                                                                      |
| substance misuse†                                         | 41203 | 291, 2910, 2918, 303, 3039, 305, 3050, 3051, 3059                                                                                                                                                                                                                                                                                                                                                                                                                              |
| psychotic disorders†                                      | 41203 | 295, 2953, 2959, 296, 2961, 298, 2982, 2988, 2989                                                                                                                                                                                                                                                                                                                                                                                                                              |

\*ICD-10, the International Classification of Diseases, 10<sup>th</sup> Revisions, †ICD-9, the International Classification of Diseases, 9<sup>th</sup> Revision.

**Supplementary Table 2** The International Classification of Diseases (ICD) codes and self-reported codes for excluded diseases.

| Diseases                                                                               | Field IDs | Codes                                                                                                                                                                                                                                                                                                                                                                                                                                                                                           |
|----------------------------------------------------------------------------------------|-----------|-------------------------------------------------------------------------------------------------------------------------------------------------------------------------------------------------------------------------------------------------------------------------------------------------------------------------------------------------------------------------------------------------------------------------------------------------------------------------------------------------|
| Fracture of bone in neoplastic disease                                                 | 41270     | M907, M9070, M9071, M9072, M9073, M9074, M9075, M9076, M9077, M9078, M9079                                                                                                                                                                                                                                                                                                                                                                                                                      |
| Follow-up care involving removal of fracture plate and other internal fixation devices | 41270     | Z470                                                                                                                                                                                                                                                                                                                                                                                                                                                                                            |
|                                                                                        | 41203     | 7331, 73313, 73315, 73316                                                                                                                                                                                                                                                                                                                                                                                                                                                                       |
| Pathological fracture                                                                  | 41270     | M800, M8000, M8001, M8003, M8007, M8008, M801, M8010, M802, M8021, M8028, M804, M8040, M8041, M8046, M8048, M8049, M805, M8050, M8052, M8053, M8055, M8058, M808, M8080, M8081, M8082, M8086, M8088, M8089, M809, M8090, M8091, M8092, M8093, M8094, M8095, M8096, M8097, M8098, M8099, M844, M8440, M8441, M8442, M8443, M8444, M8445, M8446, M8447, M8448, M8449                                                                                                                              |
|                                                                                        | 20002     | 1464                                                                                                                                                                                                                                                                                                                                                                                                                                                                                            |
| Rheumatoid arthritis                                                                   | 41270     | M0530, M0531, M0532, M0533, M0534, M0535, M0536, M0537, M0538, M0539, M0580, M0581, M0582, M0583, M0584, M0585, M0586, M058, M0588, M0589, M0590, M0591, M0592, M0593, M0594, M0595, M0596, M0597, M0598, M0599, M0600, M0601, M0602, M0603, M0604, M0605, M0606, M0607, M0608, M0609, M0680, M0681, M0682, M0683, M0684, M0685, M0686, M0687, M0688, M0689, M0690, M0691, M0692, M0693, M0694, M0695, M0696, M0697, M0698, M0699, M0800, M0801, M0802, M0804, M080, M0806, M0807, M0808, M0809 |
|                                                                                        | 41203     | 71400, 71401, 71402, 71403, 71404, 71405, 71406, 71407, 71408, 71409, 71423, 71424                                                                                                                                                                                                                                                                                                                                                                                                              |
|                                                                                        | 20002     | 1463                                                                                                                                                                                                                                                                                                                                                                                                                                                                                            |
| Ulcerative colitis                                                                     | 41270     | K518, K519, M0750, M0751, M0752, M0753, M0754, M0755, M0756, M0757, M0758, M0759, M0920, M0921, M0922, M0923, M0924, M0925, M0926, M0927, M0928, M0929                                                                                                                                                                                                                                                                                                                                          |
|                                                                                        | 20002     | 1261                                                                                                                                                                                                                                                                                                                                                                                                                                                                                            |
| Multiple sclerosis                                                                     | 41270     | G35                                                                                                                                                                                                                                                                                                                                                                                                                                                                                             |
|                                                                                        | 41203     | 3409                                                                                                                                                                                                                                                                                                                                                                                                                                                                                            |
|                                                                                        | 20002     | 1462                                                                                                                                                                                                                                                                                                                                                                                                                                                                                            |
| Crohn's disease                                                                        | 41270     | K50, K500, K501, K508, K509, M074, M0740, M0741, M0742, M0743, M0744, M0745, M0746, M0747, M0748, M0749, M091, M0910, M0911, M0912, M0913, M0914, M0915, M0916, M0917, M0918, M0919                                                                                                                                                                                                                                                                                                             |
| Hyperthyroidism                                                                        | 20002     | 1225                                                                                                                                                                                                                                                                                                                                                                                                                                                                                            |

---

|                     |       |                                                 |
|---------------------|-------|-------------------------------------------------|
|                     | 41270 | E050, E051, E052, E053,,E058, E059, E062        |
|                     | 41203 | 2424, 2428, 2429, 7753                          |
| Lupus erythematosus | 41270 | L930, L931, L932, M320, M321, M328, M329, M3290 |
|                     | 41203 | 6954, 7100                                      |

---

**Supplementary Table 3** The prevalence of fracture in male, female and pooled samples with or without MDD and the prevalence of MDD in male, female and pooled samples with or without fracture.

|             |                | <b>Non-fracture</b> | <b>Fracture</b> | <b>Sum</b> | <b>Prevalence #</b> | <b>P value*</b> |              | <b>Non-depression</b> | <b>Depression</b> | <b>Sum</b> | <b>Prevalence +</b> | <b>P value*</b> |
|-------------|----------------|---------------------|-----------------|------------|---------------------|-----------------|--------------|-----------------------|-------------------|------------|---------------------|-----------------|
| Female      | Depression     | 4826                | 1468            | 6294       | 23.32%              | <0.001          | Fracture     | 20756                 | 1752              | 22508      | 7.78%               | <0.001          |
|             | Non-depression | 206113              | 17542           | 223655     | 7.84%               |                 | Non-fracture | 215446                | 8785              | 224231     | 3.92%               |                 |
| Male        | Depression     | 3152                | 754             | 3906       | 19.30%              | <0.001          | Fracture     | 14564                 | 957               | 15521      | 6.17%               | <0.001          |
|             | Non-depression | 182926              | 12906           | 195832     | 6.59%               |                 | Non-fracture | 184726                | 5002              | 189728     | 2.64%               |                 |
| Male+Female | Depression     | 7978                | 2222            | 10200      | 21.78%              | <0.001          | Fracture     | 35320                 | 2709              | 38029      | 7.12%               | <0.001          |
|             | Non-depression | 389039              | 30448           | 419487     | 7.26%               |                 | Non-fracture | 400172                | 13787             | 413959     | 3.33%               |                 |
| Total       |                | 397017              | 32670           | 429687     | 7.60%               |                 |              | 435492                | 16496             | 451988     | 3.65%               |                 |

# The prevalence of fracture in samples with or without depression

+ The prevalence of depression in samples with or without fracture

\* Chi-square test of the prevalence difference between depression group and non-depression group and the prevalence difference between fracture group and non-fracture group in male, female and pooled samples



**Supplementary Table 4** The prevalence of fracture in different age groups with or without MDD and the prevalence of MDD in different age groups with or without fracture.

| Age   |                | Non-Fracture | Fracture | Sum    | Prevalence# | P value* | Non-depression | Depression | Sum   | Prevalence+ | P value* |         |
|-------|----------------|--------------|----------|--------|-------------|----------|----------------|------------|-------|-------------|----------|---------|
| ≤44   | Depression     | 724          | 157      | 881    | 17.82%      | < 0.001  | Fracture       | 2497       | 219   | 2716        | 8.06%    | < 0.001 |
|       | Non-depression | 39251        | 2189     | 41440  | 5.28%       |          | Non-Fracture   | 40357      | 1517  | 41874       | 3.62%    |         |
| 45-59 | Depression     | 3722         | 977      | 4699   | 20.79%      | < 0.001  | Fracture       | 14063      | 1181  | 15244       | 7.75%    | < 0.001 |
|       | Non-depression | 181092       | 12189    | 193281 | 6.31%       |          | Non-Fracture   | 187071     | 6574  | 193645      | 3.39%    |         |
| ≥60   | Depression     | 3532         | 1088     | 4620   | 23.55%      | < 0.001  | Fracture       | 18760      | 1309  | 20069       | 6.52%    | < 0.001 |
|       | Non-depression | 168696       | 16070    | 184766 | 8.70%       |          | Non-Fracture   | 172744     | 5696  | 178440      | 3.19%    |         |
| Total |                | 397017       | 32670    | 429687 | 7.60%       |          |                | 435492     | 16496 | 451988      | 3.65%    |         |

# The prevalence of fracture in samples with or without depression

+ The prevalence of depression in samples with or without fracture

\* Chi-square test of the prevalence difference between depression group and non-depression group and the prevalence difference between fracture group and non-fracture group in male, female and pooled samples

**Supplementary Table 5** The information of 74 lead SNPs for MDD with the risk of fracture.

| CHR | BP        | SNP        | A1 | A2 | beta_MDD | P_MDD  | SE_MDD | beta_fracture | P_fracture | SE_fracture |
|-----|-----------|------------|----|----|----------|--------|--------|---------------|------------|-------------|
| 1   | 18122009  | rs4141983  | t  | c  | 0.03     | <0.001 | 0.00   | 0.00          | 0.870      | 0.01        |
| 1   | 49803103  | rs35466861 | a  | g  | 0.05     | <0.001 | 0.01   | 0.00          | 0.880      | 0.01        |
| 1   | 50559162  | rs11579246 | a  | g  | 0.05     | <0.001 | 0.01   | 0.00          | 0.840      | 0.01        |
| 1   | 52274078  | rs7551758  | t  | g  | -0.03    | <0.001 | 0.00   | 0.00          | 0.970      | 0.01        |
| 1   | 67083671  | rs6656912  | t  | c  | -0.03    | <0.001 | 0.00   | -0.03         | <0.001     | 0.01        |
| 1   | 72765116  | rs2568958  | a  | g  | 0.04     | <0.001 | 0.00   | 0.00          | 0.930      | 0.01        |
| 1   | 73664022  | rs6424532  | a  | g  | 0.03     | <0.001 | 0.00   | 0.02          | 0.005      | 0.01        |
| 1   | 175913828 | rs10913112 | t  | c  | -0.03    | <0.001 | 0.00   | 0.00          | 0.690      | 0.01        |
| 1   | 197704717 | rs17641524 | t  | c  | -0.03    | <0.001 | 0.01   | -0.01         | 0.160      | 0.01        |
| 2   | 208049581 | rs2111592  | a  | g  | 0.03     | <0.001 | 0.00   | 0.00          | 0.830      | 0.01        |
| 2   | 212618440 | rs72948506 | a  | g  | 0.03     | <0.001 | 0.00   | 0.00          | 0.930      | 0.01        |
| 3   | 49214303  | rs9831648  | t  | g  | -0.03    | <0.001 | 0.01   | -0.02         | 0.045      | 0.01        |
| 3   | 49798864  | rs7621797  | a  | g  | 0.03     | <0.001 | 0.01   | 0.02          | 0.072      | 0.01        |
| 3   | 61255413  | rs843812   | a  | g  | 0.02     | <0.001 | 0.00   | -0.01         | 0.270      | 0.01        |
| 3   | 115977242 | rs76954012 | a  | t  | 0.04     | <0.001 | 0.01   | 0.01          | 0.570      | 0.01        |
| 3   | 117515519 | rs66511648 | t  | c  | -0.03    | <0.001 | 0.00   | 0.01          | 0.260      | 0.01        |
| 3   | 158171455 | rs12631196 | a  | g  | 0.02     | <0.001 | 0.00   | 0.00          | 0.950      | 0.01        |
| 5   | 87545318  | rs3099439  | t  | c  | -0.02    | <0.001 | 0.00   | 0.00          | 0.630      | 0.01        |
| 5   | 103972357 | rs30266    | a  | g  | 0.04     | <0.001 | 0.00   | 0.02          | 0.004      | 0.01        |
| 5   | 164487555 | rs7725715  | a  | g  | 0.03     | <0.001 | 0.00   | 0.00          | 0.940      | 0.01        |
| 6   | 25710571  | rs68006638 | a  | g  | -0.04    | <0.001 | 0.01   | 0.01          | 0.480      | 0.01        |
| 6   | 26599509  | rs45527431 | a  | g  | 0.05     | <0.001 | 0.01   | -0.01         | 0.590      | 0.01        |
| 6   | 26668216  | rs62396201 | a  | g  | 0.02     | <0.001 | 0.00   | 0.00          | 0.560      | 0.01        |

|   |           |             |   |   |       |        |      |       |       |      |
|---|-----------|-------------|---|---|-------|--------|------|-------|-------|------|
| 6 | 27197931  | rs55658856  | a | g | -0.08 | <0.001 | 0.01 | -0.02 | 0.300 | 0.02 |
| 6 | 27274834  | rs56114371  | t | c | -0.05 | <0.001 | 0.01 | 0.00  | 0.660 | 0.01 |
| 6 | 27384520  | rs6929812   | t | c | -0.03 | <0.001 | 0.00 | -0.01 | 0.190 | 0.01 |
| 6 | 27775674  | rs200484    | a | g | 0.05  | <0.001 | 0.01 | 0.01  | 0.340 | 0.01 |
| 6 | 28326431  | rs116406755 | a | g | 0.04  | <0.001 | 0.01 | 0.02  | 0.110 | 0.01 |
| 6 | 28366151  | rs2232423   | a | g | 0.06  | <0.001 | 0.01 | 0.00  | 0.780 | 0.01 |
| 6 | 28828010  | rs116380322 | t | c | -0.06 | <0.001 | 0.01 | -0.02 | 0.150 | 0.01 |
| 6 | 29725013  | rs115938232 | a | g | -0.06 | <0.001 | 0.01 | 0.01  | 0.570 | 0.01 |
| 6 | 31102618  | rs3130566   | c | g | 0.04  | <0.001 | 0.01 | 0.00  | 0.620 | 0.01 |
| 6 | 31840477  | rs501942    | t | c | -0.04 | <0.001 | 0.01 | 0.00  | 0.920 | 0.01 |
| 6 | 32577633  | rs535777    | c | g | -0.04 | <0.001 | 0.01 | 0.01  | 0.580 | 0.01 |
| 6 | 66534041  | rs68170059  | t | g | -0.03 | <0.001 | 0.01 | 0.00  | 0.790 | 0.01 |
| 6 | 67000001  | rs2214123   | a | g | 0.03  | <0.001 | 0.00 | 0.00  | 0.820 | 0.01 |
| 6 | 142996618 | rs2876520   | c | g | -0.03 | <0.001 | 0.00 | 0.00  | 0.760 | 0.01 |
| 6 | 165117329 | rs9364755   | a | g | -0.03 | <0.001 | 0.01 | -0.01 | 0.110 | 0.01 |
| 7 | 2086814   | rs10235664  | t | c | 0.03  | <0.001 | 0.00 | 0.01  | 0.330 | 0.01 |
| 7 | 12250402  | rs3807865   | a | g | 0.03  | <0.001 | 0.00 | 0.00  | 0.720 | 0.01 |
| 7 | 38724868  | rs59082935  | t | c | 0.04  | <0.001 | 0.01 | 0.02  | 0.130 | 0.01 |
| 7 | 82454404  | rs2247523   | c | g | -0.02 | <0.001 | 0.00 | 0.01  | 0.100 | 0.01 |
| 7 | 109100414 | rs4730387   | a | t | 0.02  | <0.001 | 0.00 | -0.01 | 0.073 | 0.01 |
| 7 | 117522956 | rs10242758  | t | g | 0.03  | <0.001 | 0.00 | 0.02  | 0.005 | 0.01 |
| 9 | 11203149  | rs1931388   | a | g | 0.03  | <0.001 | 0.00 | 0.01  | 0.059 | 0.01 |
| 9 | 11522951  | rs958538    | t | c | 0.03  | <0.001 | 0.01 | 0.00  | 0.710 | 0.01 |
| 9 | 17016503  | rs263645    | a | t | 0.03  | <0.001 | 0.00 | -0.01 | 0.083 | 0.01 |
| 9 | 25235063  | rs12057031  | t | c | -0.04 | <0.001 | 0.01 | 0.00  | 0.810 | 0.01 |

|    |           |            |   |   |       |        |      |       |        |      |
|----|-----------|------------|---|---|-------|--------|------|-------|--------|------|
| 9  | 36999369  | rs7030813  | t | c | 0.02  | <0.001 | 0.00 | -0.01 | 0.047  | 0.01 |
| 9  | 37182655  | rs62535714 | a | g | 0.03  | <0.001 | 0.01 | -0.01 | 0.380  | 0.01 |
| 9  | 119731359 | rs2418449  | t | c | 0.03  | <0.001 | 0.00 | -0.01 | 0.320  | 0.01 |
| 10 | 106551929 | rs971527   | t | c | 0.03  | <0.001 | 0.01 | 0.01  | 0.061  | 0.01 |
| 10 | 106610839 | rs1021363  | a | g | 0.03  | <0.001 | 0.00 | 0.01  | 0.140  | 0.01 |
| 11 | 61471678  | rs198457   | t | c | -0.03 | <0.001 | 0.01 | 0.01  | 0.180  | 0.01 |
| 11 | 88748162  | rs10501696 | a | g | 0.03  | <0.001 | 0.00 | 0.00  | 0.610  | 0.01 |
| 11 | 113283459 | rs6277     | a | g | -0.02 | <0.001 | 0.00 | 0.01  | 0.050  | 0.01 |
| 11 | 113365084 | rs4936275  | t | c | 0.03  | <0.001 | 0.00 | 0.00  | 0.970  | 0.01 |
| 12 | 52352301  | rs61914045 | a | g | 0.03  | <0.001 | 0.01 | 0.01  | 0.240  | 0.01 |
| 13 | 31790053  | rs9529218  | t | c | -0.03 | <0.001 | 0.01 | 0.00  | 0.920  | 0.01 |
| 13 | 53860655  | rs9536381  | t | c | 0.03  | <0.001 | 0.00 | 0.00  | 0.920  | 0.01 |
| 13 | 80921519  | rs508502   | t | c | -0.03 | <0.001 | 0.00 | 0.00  | 0.480  | 0.01 |
| 14 | 42097937  | rs1950829  | a | g | 0.03  | <0.001 | 0.00 | -0.01 | 0.180  | 0.01 |
| 14 | 75125540  | rs7152906  | t | c | -0.03 | <0.001 | 0.00 | 0.00  | 0.970  | 0.01 |
| 14 | 103997525 | rs754287   | a | t | -0.03 | <0.001 | 0.00 | -0.02 | 0.003  | 0.01 |
| 15 | 88945878  | rs28541419 | c | g | 0.03  | <0.001 | 0.01 | 0.00  | 0.590  | 0.01 |
| 16 | 13800430  | rs12919291 | c | g | 0.03  | <0.001 | 0.01 | 0.02  | 0.003  | 0.01 |
| 18 | 35155910  | rs4799949  | t | c | -0.03 | <0.001 | 0.00 | 0.00  | 0.740  | 0.01 |
| 18 | 50776391  | rs17410557 | t | c | -0.03 | <0.001 | 0.00 | -0.01 | 0.130  | 0.01 |
| 18 | 52474170  | rs8093506  | a | g | 0.03  | <0.001 | 0.01 | 0.03  | <0.001 | 0.01 |
| 18 | 52757346  | rs9953930  | t | c | 0.03  | <0.001 | 0.01 | 0.01  | 0.560  | 0.01 |
| 18 | 53099012  | rs12967143 | c | g | -0.03 | <0.001 | 0.00 | -0.01 | 0.370  | 0.01 |
| 18 | 53207207  | rs1452787  | a | g | -0.03 | <0.001 | 0.00 | 0.00  | 0.900  | 0.01 |
| 18 | 77580712  | rs7241572  | a | g | 0.03  | <0.001 | 0.01 | 0.01  | 0.230  | 0.01 |

---

|    |          |            |   |   |      |        |      |      |       |      |
|----|----------|------------|---|---|------|--------|------|------|-------|------|
| 20 | 44692598 | rs13037326 | t | c | 0.03 | <0.001 | 0.00 | 0.00 | 0.650 | 0.01 |
|----|----------|------------|---|---|------|--------|------|------|-------|------|

---

**Supplementary Table 6** Baseline characteristics of participants and comparison between individuals with and without MDD and fracture.

| Baseline characteristic    | Overall<br>(N=429,687) | Whether participants with depression or not |                   |        | P value        | Overall<br>(N=451,988) | Whether participants with fracture or not |                   |         |
|----------------------------|------------------------|---------------------------------------------|-------------------|--------|----------------|------------------------|-------------------------------------------|-------------------|---------|
|                            |                        | NO<br>(N=419,487)                           | Yes<br>(N=10,200) |        |                |                        | NO<br>(N=413,959)                         | Yes<br>(N=38,029) | P value |
| sex =1 (%)                 | 199738 (46.50)         | 195832 (46.70)                              | 3906 (38.30)      | <0.001 | 205249 (45.40) | 189728 (45.80)         | 15521 (40.80)                             | <0.001            |         |
| Ref_Age (mean (SD))        | 58.82 (11.44)          | 58.70 (11.44)                               | 63.62 (10.41)     | <0.001 | 58.44 (11.38)  | 58.30 (11.37)          | 59.93 (11.43)                             | <0.001            |         |
| BMI (mean (SD))            | 27.34 (4.72)           | 27.31 (4.68)                                | 28.78 (5.88)      | <0.001 | 27.36 (4.74)   | 27.36 (4.72)           | 27.31 (4.88)                              | 0.054             |         |
| Employment status =1 (%)   | 249462 (58.20)         | 245399 (58.70)                              | 4063 (40.00)      | <0.001 | 261371 (58.00) | 242867 (58.80)         | 18504 (48.80)                             | <0.001            |         |
| Education =1 (%)           | 352085 (83.10)         | 344667 (83.30)                              | 7418 (74.20)      | <0.001 | 369846 (83.00) | 340576 (83.40)         | 29270 (78.40)                             | <0.001            |         |
| Smoking =1 (%)             | 194302 (45.40)         | 188643 (45.10)                              | 5659 (55.80)      | <0.001 | 204948 (45.50) | 186841 (45.30)         | 18107 (47.80)                             | <0.001            |         |
| Alcohol =1 (%)             | 402021 (93.60)         | 393266 (93.80)                              | 8755 (86.10)      | <0.001 | 422282 (93.50) | 387351 (93.60)         | 34931 (92.00)                             | <0.001            |         |
| Medication =1 (%)          | 14267 (3.30)           | 11404 (2.70)                                | 2863 (28.10)      | <0.001 | 16164 (3.60)   | 14459 (3.50)           | 1705 (4.50)                               | <0.001            |         |
| Physical activity =1 (%)   | 299229 (69.60)         | 293149 (69.90)                              | 6080 (59.60)      | <0.001 | 313528 (69.40) | 287730 (69.50)         | 25798 (67.80)                             | <0.001            |         |
| Sleep duration (mean (SD)) | 7.12 (1.22)            | 7.13 (1.20)                                 | 7.08 (1.87)       | <0.001 | 7.12 (1.23)    | 7.13 (1.21)            | 7.07 (1.39)                               | <0.001            |         |
| Grip strength (mean (SD))  | 32.14 (11.19)          | 32.23 (11.19)                               | 28.39 (10.77)     | <0.001 | 31.88 (11.26)  | 32.06 (11.22)          | 29.92 (11.54)                             | <0.001            |         |
| Falls =1 (%)               | 81007 (18.90)          | 77570 (18.50)                               | 3437 (33.90)      | <0.001 | 87403 (19.40)  | 76506 (18.50)          | 10897 (28.70)                             | <0.001            |         |
| BMD (mean (SD))            | 0.54 (0.14)            | 0.54 (0.14)                                 | 0.53 (0.14)       | <0.001 | 0.54 (0.14)    | 0.55 (0.14)            | 0.50 (0.13)                               | <0.001            |         |
| Cannabis =1 (%)            | 30938 (22.00)          | 30395 (22.00)                               | 543 (24.10)       | 0.016  | 32683 (22.00)  | 30185 (21.90)          | 2498 (23.30)                              | 0.001             |         |
| Fracture =1 (%)            | 32670 (7.60)           | 30448 (7.30)                                | 2222 (21.80)      | <0.001 | 38029 (8.40)   | 0 (0.00)               | 38029 (100.00)                            | <0.001            |         |
| Depression =1 (%)          | 10200 (2.40)           | 0 (0.00)                                    | 10200 (100.00)    | <0.001 | 16496 (3.60)   | 13787 (3.30)           | 2709 (7.10)                               | <0.001            |         |

BMD, bone mineral density; BMI, body mass index.

**Supplementary Table 7** The results of genetic correlation and cross-trait analysis between MDD and fracture.

| Method                                  | rg                 | se                 | z                   | P value           | h2_obs               | h2_obs_se      | h2_int                                        | h2_int_se            | gcov_int             | gcov_int_se             |                  |
|-----------------------------------------|--------------------|--------------------|---------------------|-------------------|----------------------|----------------|-----------------------------------------------|----------------------|----------------------|-------------------------|------------------|
| linkage disequilibrium score regression | 0.21               | 0.03               | 7.09                | 1.36E-12          | 0.08                 | 3.10E-03       | 0.99                                          | 0.01                 | 0.02                 | 0.01                    |                  |
|                                         | nc1@p9, mean (std) | nc2@p9, mean (std) | nc12@p9, mean (std) | nc@p9, mean (std) | rho_beta, mean (std) | rg, mean (std) | fraction_concordant_within_shared, mean (std) | $\pi_1$ , mean (std) | $\pi_2$ , mean (std) | $\pi_{12}$ , mean (std) | dice, mean (std) |
| MiXeR                                   | 11428 (579)        | 203 (80)           | 866 (94)            | 12294 (565)       | 0.96 (0.04)          | 0.23 (0.02)    | 0.92 (0.04)                                   | 4E-03 (1.82E-04)     | 6.37E-05 (2.50E-05)  | 2.71E-04 (2.94E-05)     | 12.97% (1.45%)   |

rg = genetic correlation, se = standard error of rg, P value = p-value for rg, gcov\_int, gcov\_int\_se = cross-trait LD Score regression intercept and standard error.

nc1@p9, nc2@p9, and nc12@p9 = the number of causal variants for trait1, trait2 and both, respectively; nc@p9 = number of trait-influencing variants specific to MDD; rho\_beta = the correlation of effect sizes within the shared polygenic component; rg = genetic correlation; concordant\_fraction = the proportion of shared variants with concordant direction of effect in both traits on all shared variants;  $\pi_1$ ,  $\pi_2$ , and  $\pi_{12}$  = polygenicity of trait1, trait2 and both, respectively.

**Supplementary Table 8** Distinct genomic loci shared between MDD and fracture at conjunctive false discovery rate (conjFDR)<0.05.

| locusnum | snpid      | geneid    | chrnum | chrpos   | zscore_MDD | zscore_fracture | conjfdr_MDD_fracture | pval_MDD | pval_fracture |
|----------|------------|-----------|--------|----------|------------|-----------------|----------------------|----------|---------------|
| 1        | rs7554101  | SGIP1     | 1      | 67156472 | -4.99      | -4.31           | 0.008                | <0.001   | <0.001        |
| 2        | rs310749   | PPARG     | 3      | 12273768 | -3.67      | 3.79            | 0.048                | <0.001   | <0.001        |
| 3        | rs10217595 | FAM120AOS | 9      | 96180891 | 4.23       | 4.11            | 0.017                | <0.001   | <0.001        |
| 4        | rs2311117  | RAB27B    | 18     | 52473793 | -5.18      | -3.81           | 0.042                | <0.001   | <0.001        |



**Supplementary Table 9** The results of SMR analyses for the expression of *SGIP1* (ENSG00000118473) with MDD and fracture in spinal cord (cervical) and muscle (gastrocnemius).

| Trait    | Tissue                    | topSNP         | A<br>1 | A<br>2 | Fre<br>q | b_GWA<br>S | se_GWA<br>S | p_GWA<br>S | b_eQT<br>L | se_eQT<br>L | p_eQT<br>L | b_SM<br>R | se_SM<br>R | p_SM<br>R | p_HEI<br>DI |
|----------|---------------------------|----------------|--------|--------|----------|------------|-------------|------------|------------|-------------|------------|-----------|------------|-----------|-------------|
| MDD      | spinal cord<br>(cervical) | rs668036<br>4  | A      | G      | 0.44     | 0.02       | 0.00        | <0.001     | 0.45       | 0.08        | <0.001     | 0.05      | 0.01       | <0.001    | 0.785       |
| Fracture | spinal cord<br>(cervical) | rs668036<br>4  | A      | G      | 0.44     | 0.02       | 0.01        | <0.001     | 0.45       | 0.08        | <0.001     | 0.05      | 0.02       | 0.004     | 0.055       |
| MDD      | muscle<br>(gastrocnemius) | rs112089<br>20 | A      | C      | 0.44     | 0.02       | 0.00        | <0.001     | 0.28       | 0.03        | <0.001     | 0.08      | 0.02       | <0.001    | 0.090       |
| Fracture | muscle<br>(gastrocnemius) | rs112089<br>20 | A      | C      | 0.44     | 0.02       | 0.01        | 0.001      | 0.28       | 0.03        | <0.001     | 0.08      | 0.03       | 0.002     | 0.194       |

**Supplementary Table 10** The general biological functions of 53 genes.

| Ensg            | entrezID | symbol   | hgnc_symbol | OMIM   | uniprotID | DrugBank                                                                                                                                                                                                                |
|-----------------|----------|----------|-------------|--------|-----------|-------------------------------------------------------------------------------------------------------------------------------------------------------------------------------------------------------------------------|
| ENSG00000184588 | 5142     | PDE4B    | PDE4B       | 600127 | Q07343    | DB00131:DB00201:DB00277:DB00651:DB00806:DB00824:DB01088:DB01113:DB01412:DB01427:DB01647:DB01656:DB01791:DB01954:DB01959:DB02660:DB03349:DB03606:DB03807:DB03849:DB04149:DB04530:DB05219:DB05266:DB05676:DB06909:DB08299 |
| ENSG00000118473 | 84251    | SGIP1    | SGIP1       | 611540 | Q9BQI5    | NA                                                                                                                                                                                                                      |
| ENSG00000152760 | 200132   | TCTEX1D1 | TCTEX1D1    | NA     | Q8N7M0    | NA                                                                                                                                                                                                                      |
| ENSG00000152763 | 79819    | WDR78    | WDR78       | NA     | Q5VTH9    | NA                                                                                                                                                                                                                      |
| ENSG00000198160 | 57708    | MIER1    | MIER1       | 616848 | Q8N108    | NA                                                                                                                                                                                                                      |
| ENSG00000116704 | 23169    | SLC35D1  | SLC35D1     | 610804 | Q9NTN3    | NA                                                                                                                                                                                                                      |
| ENSG00000162594 | 149233   | IL23R    | IL23R       | 607562 | Q5VWK5    | NA                                                                                                                                                                                                                      |
| ENSG00000081985 | 3595     | IL12RB2  | IL12RB2     | 601642 | Q99665    | NA                                                                                                                                                                                                                      |
| ENSG00000142864 | 26135    | SERBP1   | SERBP1      | 607378 | Q8NC51    | NA                                                                                                                                                                                                                      |
| ENSG00000116717 | 1647     | GADD45A  | GADD45A     | 126335 | P24522    | NA                                                                                                                                                                                                                      |
| ENSG00000134046 | 8932     | MBD2     | MBD2        | 603547 | Q9UBB5    | NA                                                                                                                                                                                                                      |
| ENSG00000101751 | 11201    | POLI     | POLI        | 605252 | Q9UNA4    | NA                                                                                                                                                                                                                      |
| ENSG00000166845 | 162681   | C18orf54 | C18orf54    | 613258 | Q8IYD9    | NA                                                                                                                                                                                                                      |
| ENSG00000264350 | 1E+08    | SNRPGP2  | SNRPGP2     | NA     | NA        | NA                                                                                                                                                                                                                      |
| ENSG00000041353 | 5874     | RAB27B   | RAB27B      | 603869 | O00194    | NA                                                                                                                                                                                                                      |
| ENSG00000196628 | 6925     | TCF4     | TCF4        | 602272 | P15884    | NA                                                                                                                                                                                                                      |
| ENSG00000197548 | 10533    | ATG7     | ATG7        | 608760 | O95352    | NA                                                                                                                                                                                                                      |
| ENSG00000144560 | 9686     | VGLL4    | VGLL4       | NA     | Q14135    | NA                                                                                                                                                                                                                      |
| ENSG00000144559 | 132001   | TAMM41   | TAMM41      | 614948 | Q96BW9    | NA                                                                                                                                                                                                                      |
| ENSG00000157152 | 6854     | SYN2     | SYN2        | 600755 | NA        | NA                                                                                                                                                                                                                      |
| ENSG00000226642 | 1E+08    | ACTG1P12 | ACTG1P12    | NA     | NA        | NA                                                                                                                                                                                                                      |

|                 |           |              |          |        |        |                                                                                                                                                                                                                                                                                                                                                                                                                                                                                                                                                                                                                 |
|-----------------|-----------|--------------|----------|--------|--------|-----------------------------------------------------------------------------------------------------------------------------------------------------------------------------------------------------------------------------------------------------------------------------------------------------------------------------------------------------------------------------------------------------------------------------------------------------------------------------------------------------------------------------------------------------------------------------------------------------------------|
| ENSG00000132170 | 5468      | PPARG        | PPARG    | 601487 | P37231 | DB00132:DB00159:DB00197:DB00244:DB00313:DB00328:DB00412:DB00573:DB00731:DB00795:DB00912:DB00966:DB01014:DB01039:DB01050:DB01067:DB01118:DB01132:DB01252:DB01393:DB02266:DB02709:DB02746:DB03600:DB03756:DB04224:DB04270:DB04689:DB04971:DB05187:DB05490:DB05854:DB06510:DB06521:DB06533:DB06536:DB06908:DB06926:DB07053:DB07111:DB07172:DB07208:DB07209:DB07302:DB07509:DB07675:DB07723:DB07724:DB07842:DB07863:DB08121:DB08302:DB08402:DB08435:DB08560:DB08604:DB08760:DB08915:DB09006:DB09061:DB09198:DB09201:DB09213:DB11133:DB11672:DB11811:DB12007:DB12662:DB13873:DB13961:DB14009:DB14011:DB14034:DB14635 |
| ENSG00000154743 | 80746     | TSEN2        | TSEN2    | 608753 | Q8NCE0 | NA                                                                                                                                                                                                                                                                                                                                                                                                                                                                                                                                                                                                              |
| ENSG00000075975 | 23609     | MKRN2        | MKRN2    | 608426 | Q9H000 | NA                                                                                                                                                                                                                                                                                                                                                                                                                                                                                                                                                                                                              |
| ENSG00000132155 | 5894      | RAF1         | RAF1     | 164760 | P04049 | DB00398:DB04973:DB05190:DB05268:DB08862:DB08896:DB08912:DB12010                                                                                                                                                                                                                                                                                                                                                                                                                                                                                                                                                 |
| ENSG00000233252 | 106480793 | CRIP1P1      | CRIP1P1  | NA     | NA     | NA                                                                                                                                                                                                                                                                                                                                                                                                                                                                                                                                                                                                              |
| ENSG00000088726 | 55287     | TMEM40       | TMEM40   | NA     | Q8WWA1 | NA                                                                                                                                                                                                                                                                                                                                                                                                                                                                                                                                                                                                              |
| ENSG00000144712 | 23066     | CAND2        | CAND2    | 610403 | O75155 | NA                                                                                                                                                                                                                                                                                                                                                                                                                                                                                                                                                                                                              |
| ENSG00000144713 | 6161      | RPL32        | RPL32    | NA     | P62910 | NA                                                                                                                                                                                                                                                                                                                                                                                                                                                                                                                                                                                                              |
| ENSG00000144711 | 9922      | IQSEC1       | IQSEC1   | 610166 | Q6DN90 | NA                                                                                                                                                                                                                                                                                                                                                                                                                                                                                                                                                                                                              |
| ENSG00000188312 | 401541    | CENPP        | CENPP    | 611505 | Q6IPU0 | NA                                                                                                                                                                                                                                                                                                                                                                                                                                                                                                                                                                                                              |
| ENSG00000127080 | 64768     | IPPK         | IPPK     | NA     | Q9H8X2 | NA                                                                                                                                                                                                                                                                                                                                                                                                                                                                                                                                                                                                              |
| ENSG00000185963 | 23299     | BICD2        | BICD2    | 609797 | Q8TD16 | NA                                                                                                                                                                                                                                                                                                                                                                                                                                                                                                                                                                                                              |
| ENSG00000187984 | 138649    | ANKRD19P     | ANKRD19P | NA     | NA     | NA                                                                                                                                                                                                                                                                                                                                                                                                                                                                                                                                                                                                              |
| ENSG00000127081 | 83744     | ZNF484       | ZNF484   | NA     | Q5JVG2 | NA                                                                                                                                                                                                                                                                                                                                                                                                                                                                                                                                                                                                              |
| ENSG00000127084 | 89846     | FGD3         | FGD3     | 617554 | Q5JSP0 | NA                                                                                                                                                                                                                                                                                                                                                                                                                                                                                                                                                                                                              |
| ENSG00000157303 | 203328    | SUSD3        | SUSD3    | 616429 | Q96L08 | NA                                                                                                                                                                                                                                                                                                                                                                                                                                                                                                                                                                                                              |
| ENSG00000165233 | 84270     | C9orf89      | C9orf89  | 617726 | NA     | NA                                                                                                                                                                                                                                                                                                                                                                                                                                                                                                                                                                                                              |
| ENSG00000131669 | 4814      | NINJ1        | NINJ1    | 602062 | Q92982 | NA                                                                                                                                                                                                                                                                                                                                                                                                                                                                                                                                                                                                              |
| ENSG00000165238 | 65268     | WNK2         | WNK2     | 606249 | Q9Y3S1 | NA                                                                                                                                                                                                                                                                                                                                                                                                                                                                                                                                                                                                              |
| ENSG00000204352 | 445577    | C9orf129     | C9orf129 | NA     | Q5T035 | NA                                                                                                                                                                                                                                                                                                                                                                                                                                                                                                                                                                                                              |
| ENSG00000227603 | NA        | RP11-165J3.6 | NA       | NA     | NA     | NA                                                                                                                                                                                                                                                                                                                                                                                                                                                                                                                                                                                                              |

---

|                 |           |               |              |        |        |    |
|-----------------|-----------|---------------|--------------|--------|--------|----|
| ENSG00000188938 | 158293    | FAM120AOS     | FAM120AOS    | NA     | Q5T036 | NA |
| ENSG00000048828 | 23196     | FAM120A       | FAM120A      | 612265 | Q9NZB2 | NA |
| ENSG00000197724 | 5253      | PHF2          | PHF2         | 604351 | O75151 | NA |
| ENSG00000158079 | 138639    | PTPDC1        | PTPDC1       | NA     | A2A3K4 | NA |
| ENSG00000269946 | NA        | RP11-2B6.3    | NA           | NA     | NA     | NA |
| ENSG00000269929 | NA        | RP11-2B6.2    | NA           | NA     | NA     | NA |
| ENSG00000230262 | 158257    | MIRLET7DHG    | MIRLET7DHG   | NA     | NA     | NA |
| ENSG00000199133 | 406886    | MIRLET7D      | MIRLET7D     | 612145 | NA     | NA |
| ENSG00000175787 | 169841    | ZNF169        | ZNF169       | 603404 | Q14929 | NA |
| ENSG00000232063 | 100132077 | RP11-307E17.8 | LOC100132077 | NA     | NA     | NA |
| ENSG00000148110 | 84641     | HIATL1        | HIATL1       | NA     | Q5SR56 | NA |

---

**Supplementary Fig.1** The matching information of 39 965 patients with fracture.

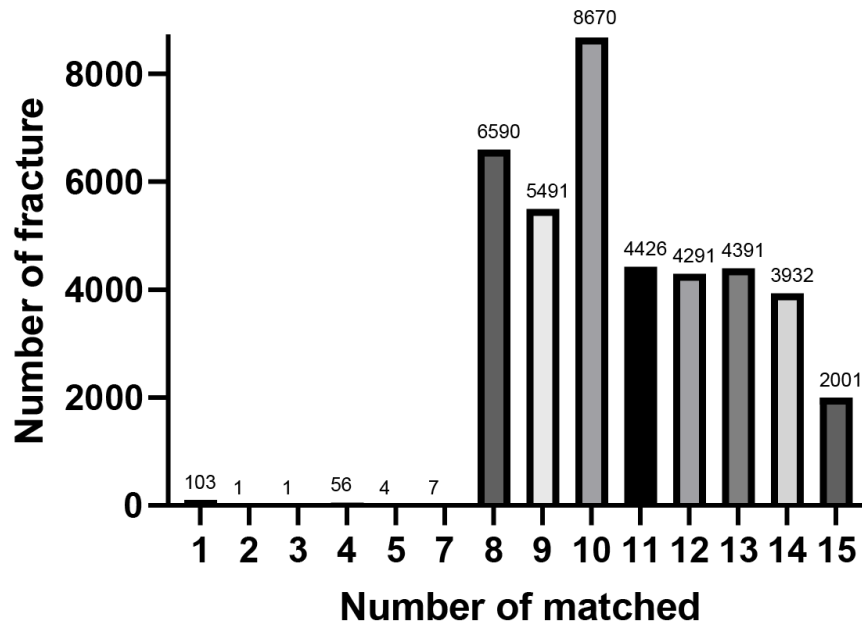

**Supplementary Fig.2** The prevalence rate in different age groups. Panel A: the prevalence rate for fracture with or without major depressive disorder (MDD). Panel B: the prevalence rate for MDD with or without fracture.

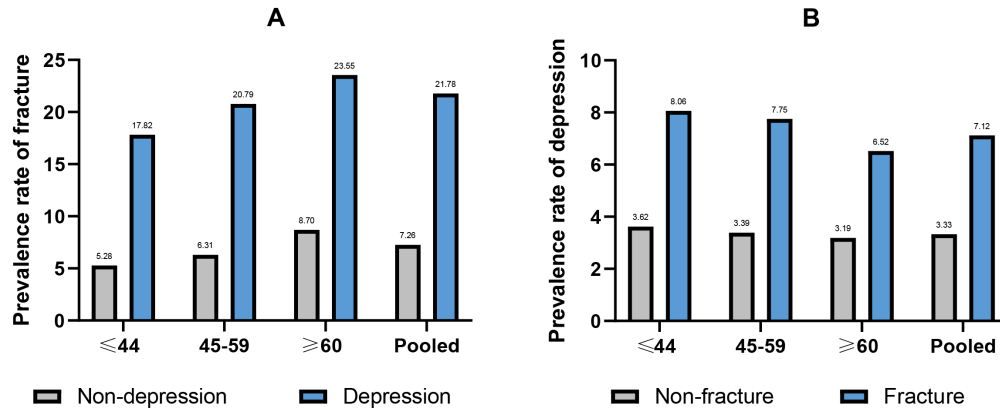

**Supplementary Fig.3** The association of genetically predicted major depressive disorder (MDD) with fracture and vice versa in male and female.

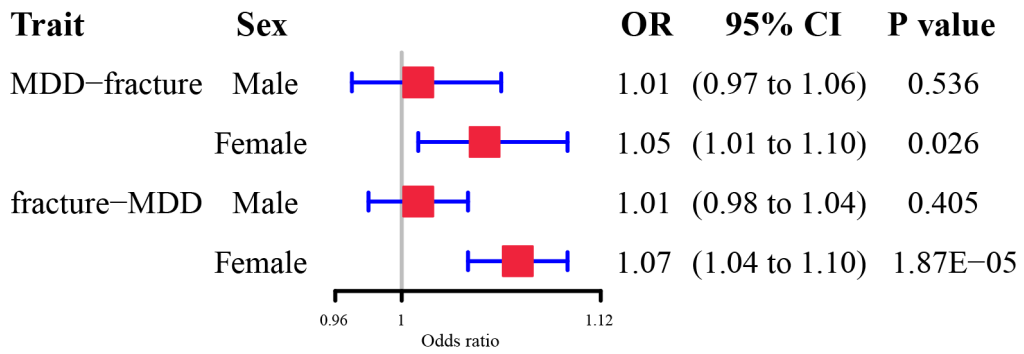





**Supplementary Fig.5** A simple illustration of the assumptive mechanism: the potential implication of the *SGIP1* gene in the pathology of major depressive disorder (MDD) and fracture.

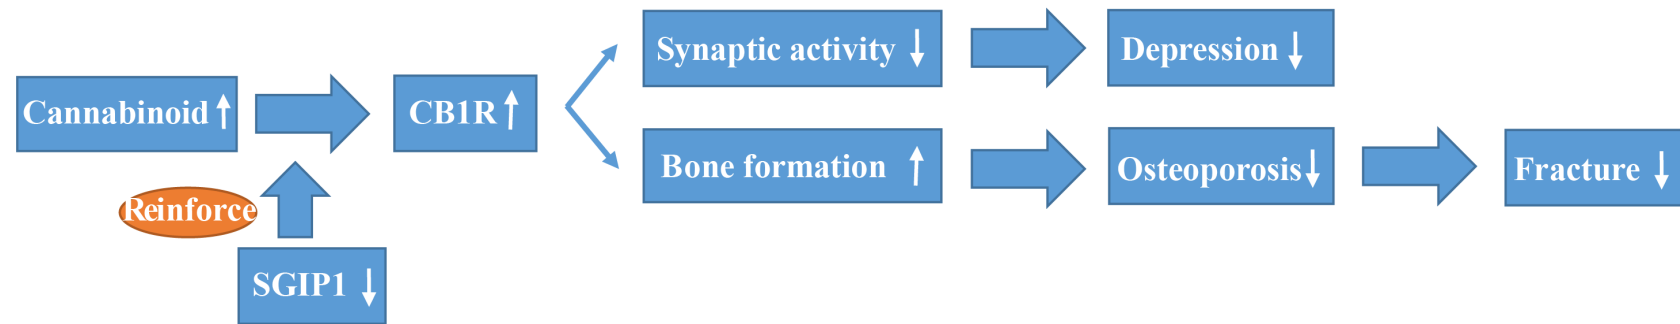

Supplement: gpsych-2023-101418supp001.pdf [file gpsych-2023-101418supp001.pdf]
